# Supplementary material for: Investigation of Multi-Subunit Mycobacterium tuberculosis DNA-Directed RNA Polymerase and Its Rifampicin Resistant Mutants
Source: MDPI journal article supplement (doi:10.3390/ijms24043313), 2023-02-07
Supplement: s1 [file s1]

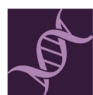

# Investigation of multi-subunit *Mycobacterium tuberculosis* DNA-directed RNA polymerase and its rifampicin resistant mutants

## Supplementary information

Mokgerwa Zacharia Monama <sup>1</sup>, Fisayo Olotu <sup>1</sup> and Özlem Tastan Bishop <sup>1,\*</sup>

<sup>1</sup> Research Unit in Bioinformatics (RUBi), Department of Biochemistry and Microbiology, Rhodes University, Makhanda 6139, South Africa

\* Correspondence: o.tastanbishop@ru.ac.za

**Table S1.** Summary of homology modelling and validation results using z-DOPE, QMEAN, PROCHECK and RMSD.

| Systems | z-DOPE score<br>(MODELLER) | RMSD (Å)<br>(5uhc vs<br>model) | QMEAN6<br>(normalized<br>score) | PROCHECK<br>(Ramachandran<br>plot) |
|---------|----------------------------|--------------------------------|---------------------------------|------------------------------------|
| wt      | -0.52                      | 0.21                           | 0.71                            | Favored, 94.1%;<br>unfavored, 0.1% |
| I65T    | -0.52                      | 0.20                           | 0.72                            | Favored, 94.1%;<br>unfavored, 0.1% |
| D441V   | -0.52                      | 0.20                           | 0.71                            | Favored, 94.0%;<br>unfavored, 0.1% |
| H451D   | -0.52                      | 0.21                           | 0.71                            | Favored, 93.9%;<br>unfavored, 0.1% |
| H451L   | -0.52                      | 0.20                           | 0.71                            | Favored, 94.0%;<br>unfavored, 0.1% |
| H451N   | -0.52                      | 0.21                           | 0.71                            | Favored, 93.8%;<br>unfavored, 0.1% |
| H451R   | -0.52                      | 0.22                           | 0.71                            | Favored, 93.8%;<br>unfavored, 0.1% |
| H451Y   | -0.51                      | 0.21                           | 0.71                            | Favored, 93.8%;<br>unfavored, 0.1% |
| S456L   | -0.51                      | 0.21                           | 0.71                            | Favored, 93.6%;<br>unfavored, 0.1% |
| D551E   | -0.52                      | 0.21                           | 0.71                            | Favored, 93.9%;<br>unfavored, 0.1% |

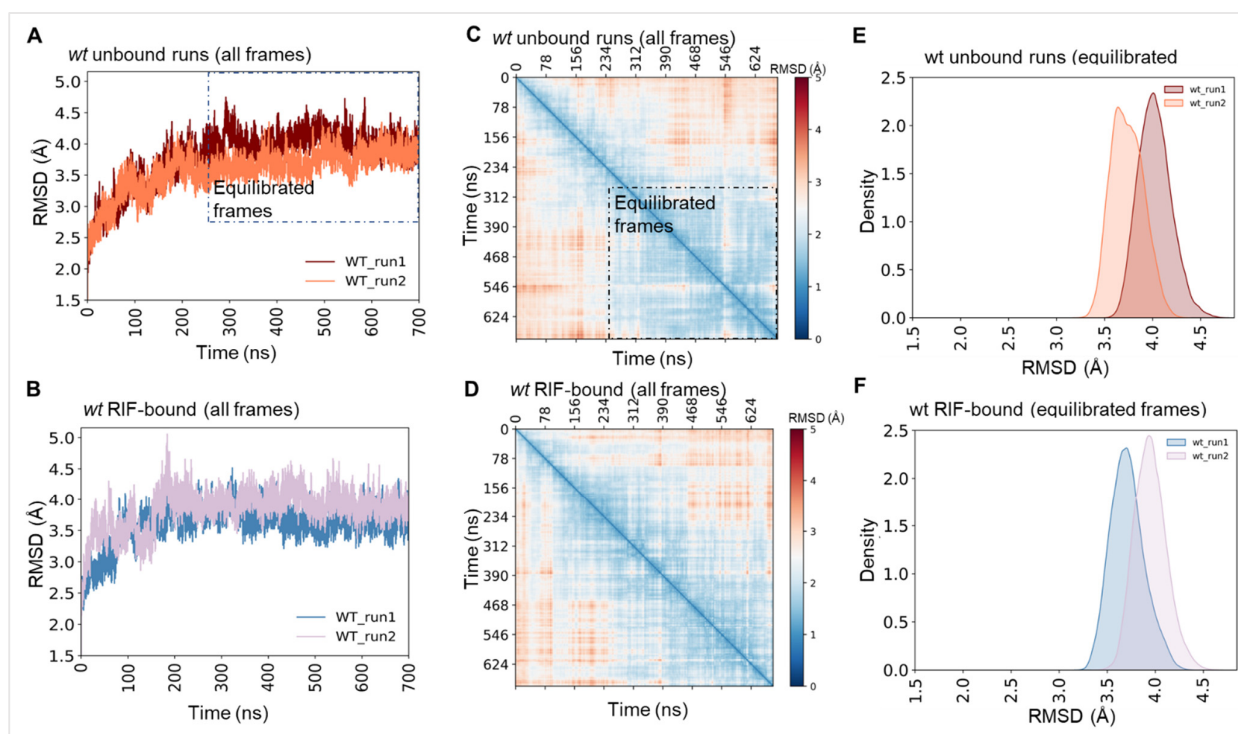

**Figure S1.** Graphical representation of the structural agreement between the duplicate *wt* runs over the equilibrated timeframes. **(A–B)** The line plots represent the  $C\alpha$ -RMSD of *wt* run1 (unbound, maroon; RIF-bound, blue) and *wt* run2 (unbound, orange; RIF-bound, pink), with respect to their initial structures. All versus all  $C\alpha$ -RMSD heatmaps are also shown for the **(C)** unbound and **(D)** RIF-bound *wt* run1 systems respectively. The heatmaps are colored from red (conformationally dissimilar) to blue (conformationally similar). Kernel density estimation (KDE) plots were shown for the **(E)** unbound and **(F)** RIF-bound duplicate *wt* runs for the equilibrated timeframes. A similar colour scheme used in the line plots is used for the KDEs.

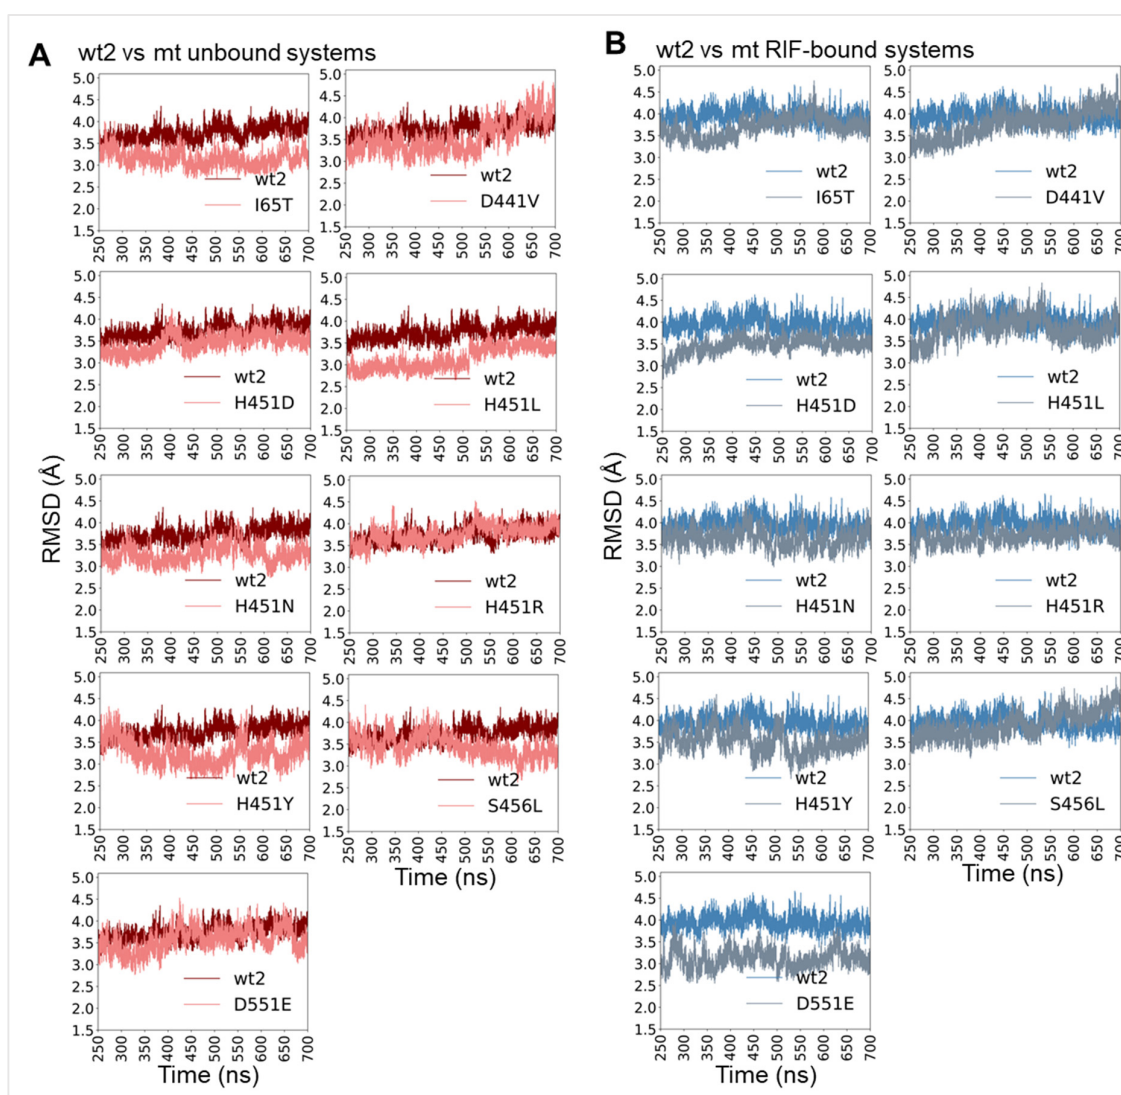

**Figure S2.** Graphical representation of the mutation- and/or RIF-induced effects on *Mtb*-RNAP conformational stability. The line plots represent the estimated  $\text{Ca}$ -RMSD comparison of the *wt* (unbound, maroon; RIF-bound, blue) and *mts* (unbound, orange; RIF-bound, pink) for the (A) unbound and (B) bound proteins over time, with respect to their initial structures.

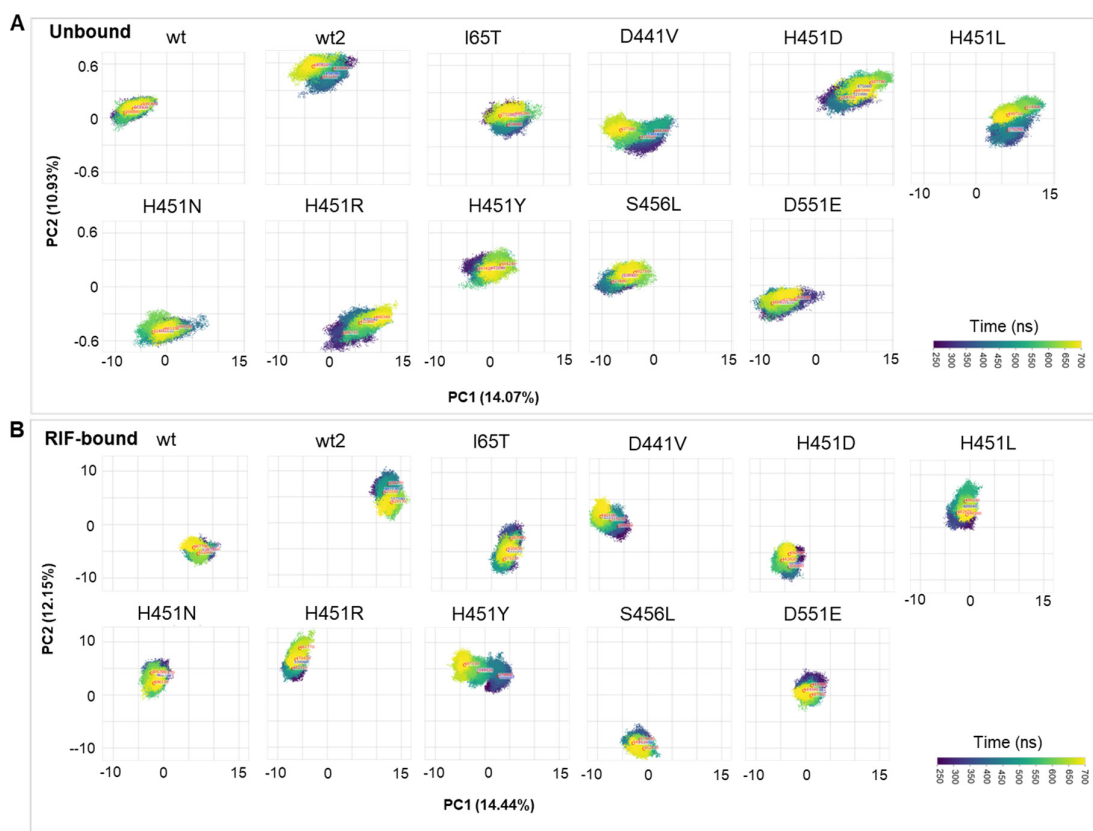

**Figure S3.** Comparative essential dynamics plots of the (A) unbound and (B) RIF-bound *wt* and *mt* *Mtb*-RNAPs. Each dot represents a conformation, and the dots are colored according to the time of sampling (dark to yellow).

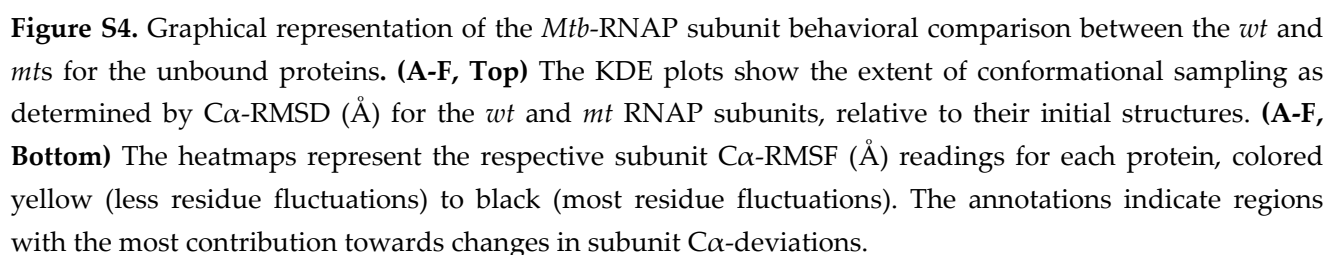

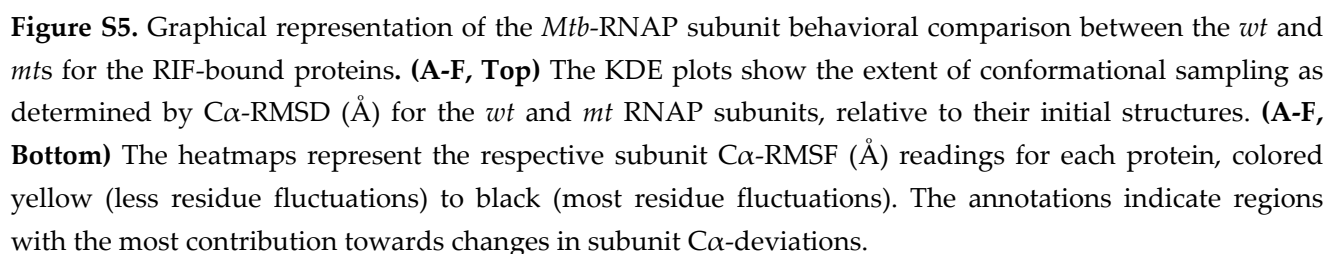



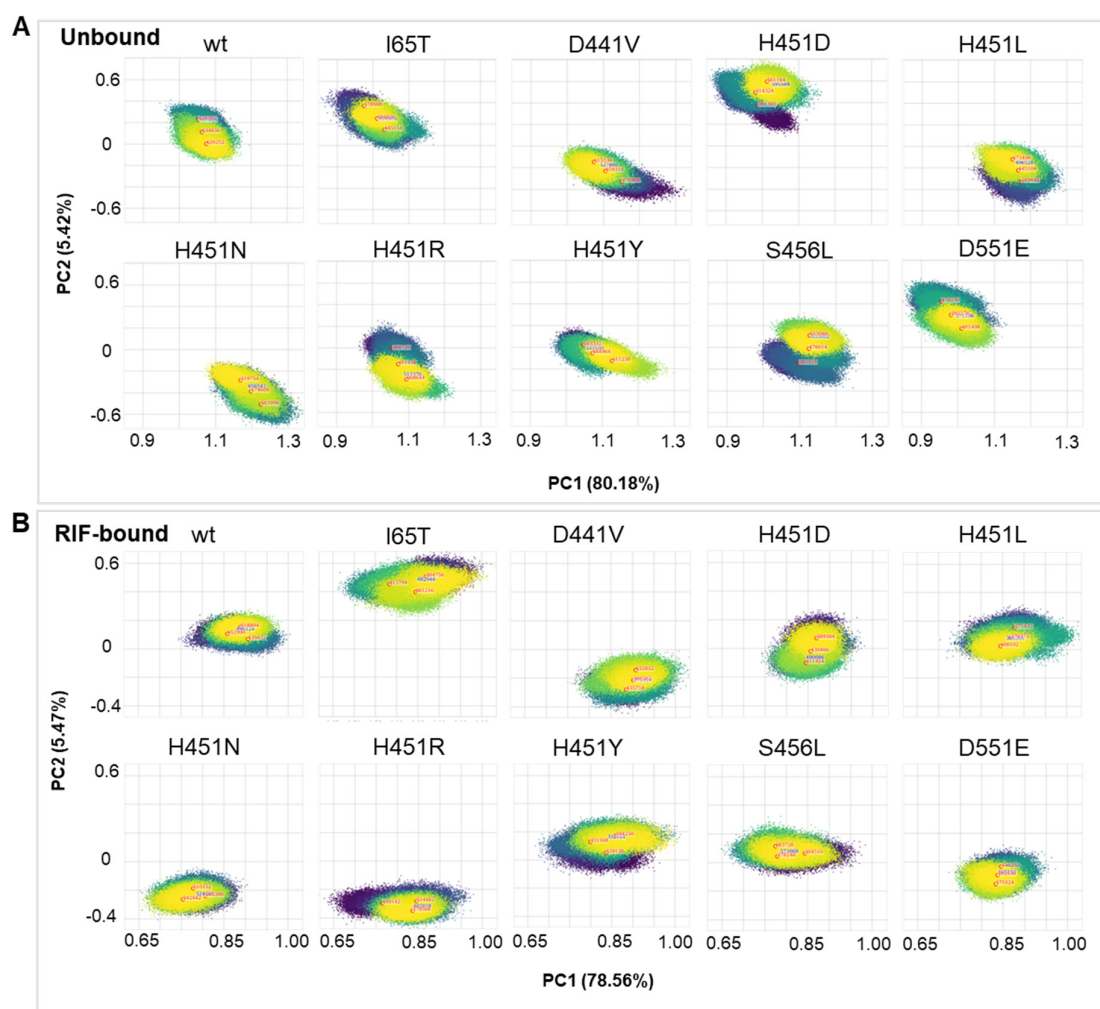

**Figure S6.** Comparative essential dynamics plots of the (A) unbound and (B) RIF-bound *wt* and *mt* RIF-BPs. Each dot represents a conformation, and the dots are colored according to the time of sampling (dark to yellow).

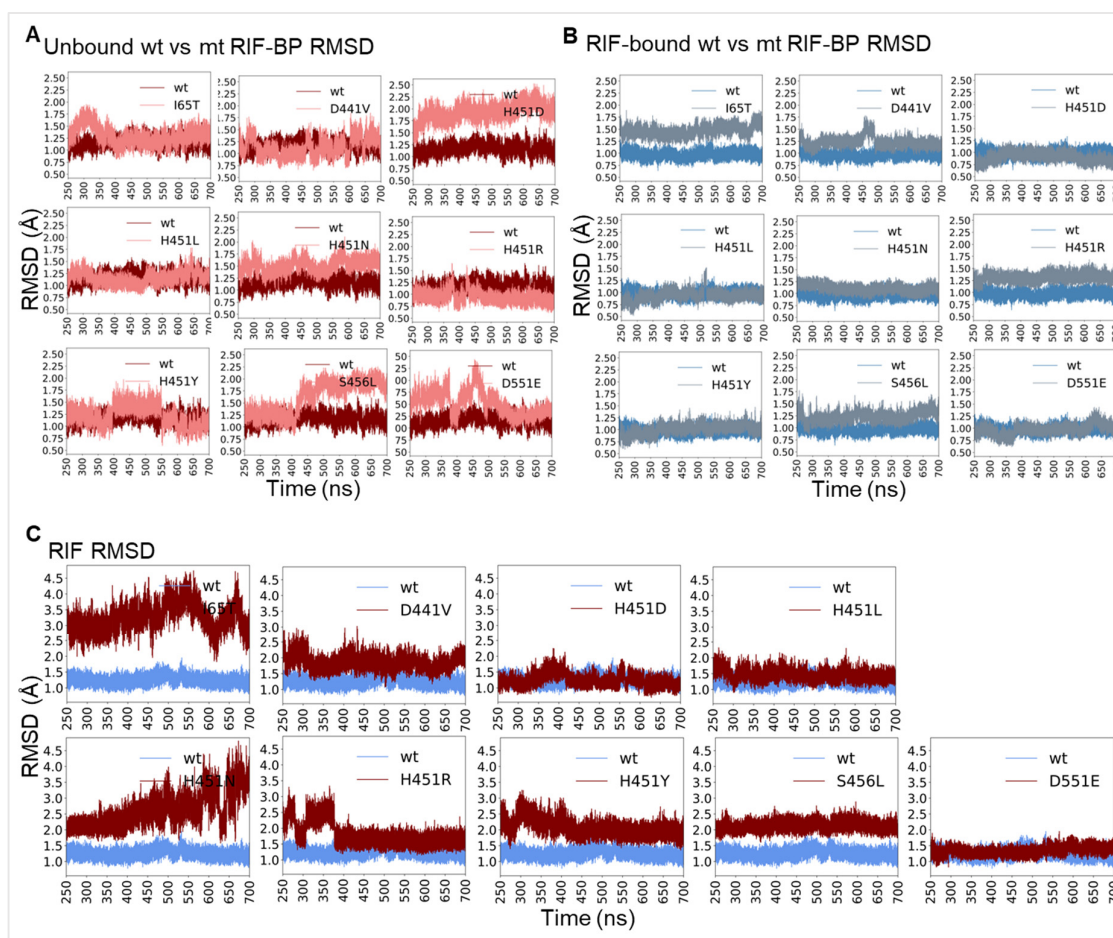

**Figure S7.** Graphical representation of RIF and RIF-BP stability over the course of the simulation. The estimated  $\text{Ca}$ -RMSD RIF-BP line plots illustrate the differences between of the *wt* (unbound, maroon; RIF-bound, blue) and *mts* (unbound, orange; RIF-bound, pink) in the (A) unbound and (B) RIF-bound forms over time, with respect to their initial structures. (C) The RMSD line plots for RIF detail the stability of the ligand (with respect to the RIF-BP) for the *wt* (blue) and *mts* (maroon) over the course of the simulations.



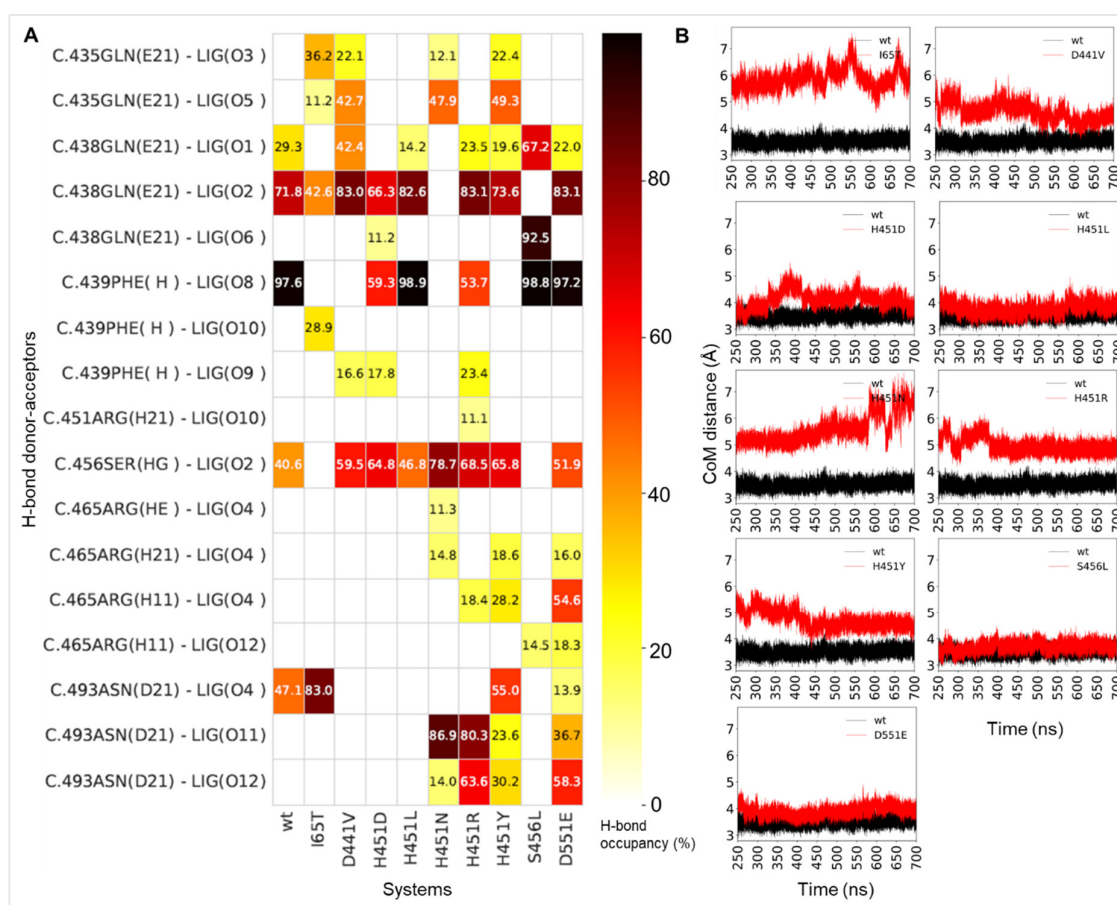

**Figure S8.** Graphical representation of RIF's H-bond interactions and displacements over time. **(A)** H-bond occupancy profile (frequency of H-bond interactions) for the *wt* and respective *mts*. **(B)** CoM plots represent the change in RIF's distance (Å) from the RIF-BP over the captured timeframes.

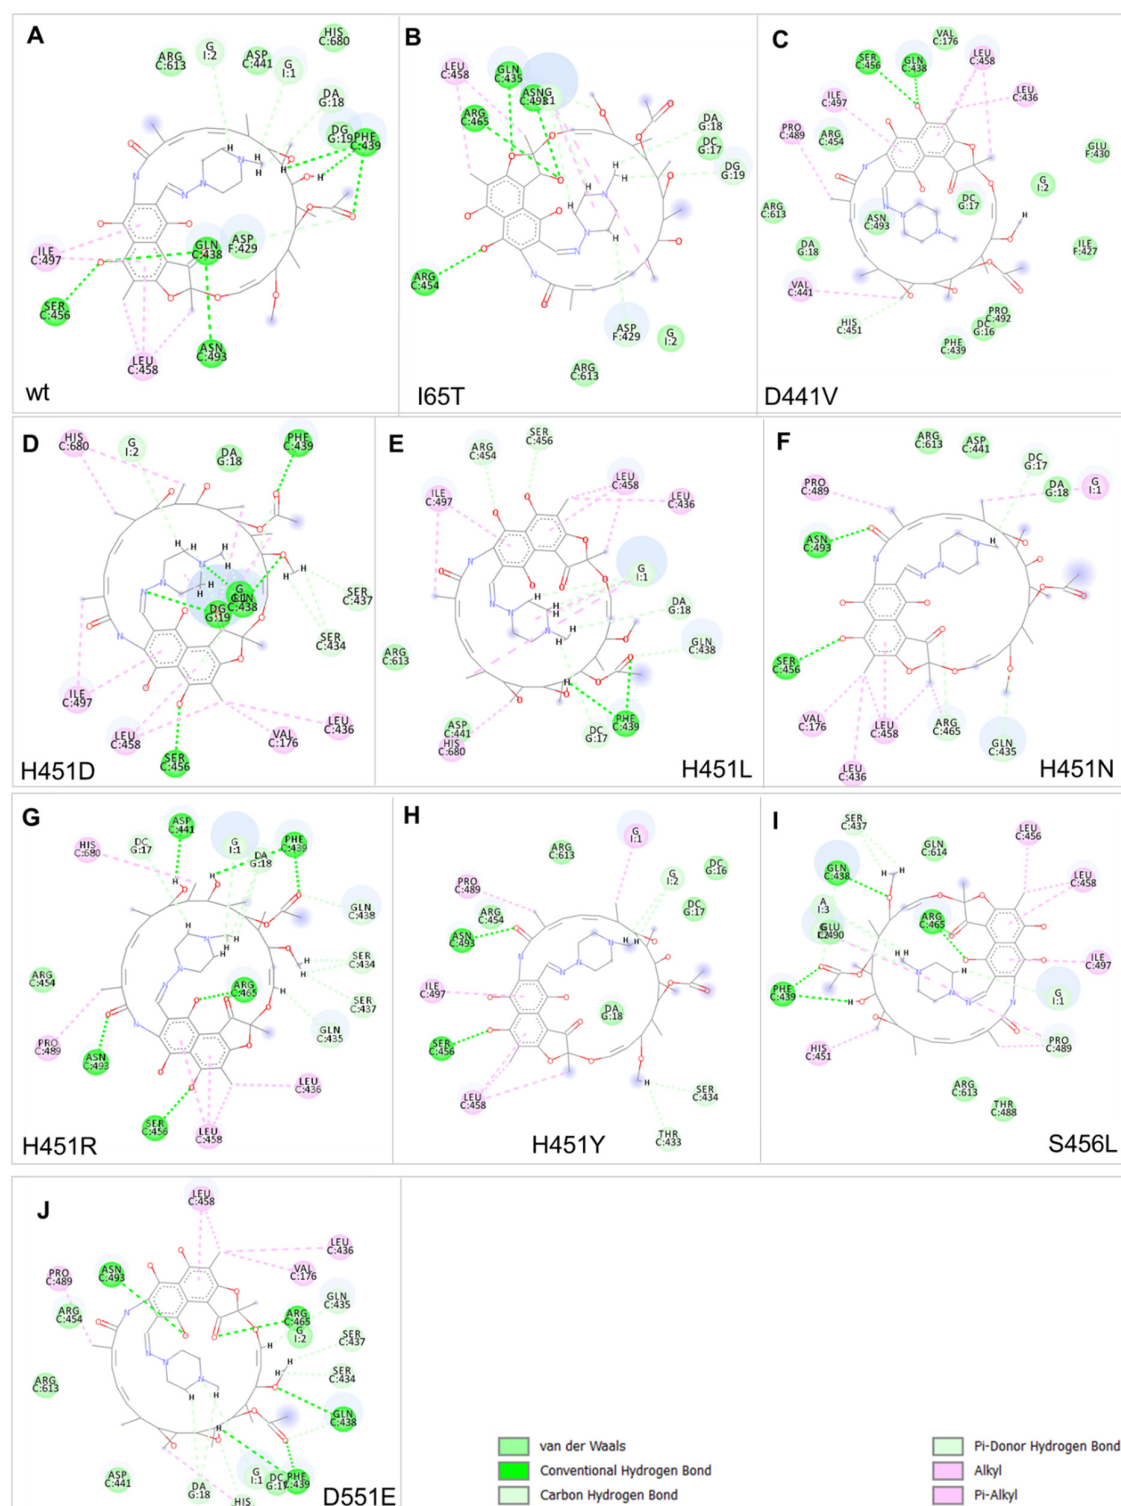

**Figure S9.** (A–J) RIF interaction profiles of the low energy minima RIF-BP structures for the respective *wt* and *mts*.
